# Supplementary material
Source: Springer Nature journal article supplement (https://www.springermedizin.de/resource/supplementary/12879_2012_2076_MOESM2_ESM.pdf/9443716)

In: 9  
OPx I25.4+C

Mag = 1.0

ET:3

00000000

FSE-XL/90  
TR:499  
TE:7.9/EF  
EC:1/1 62.5kHz

MHS CTL456/FL:s  
FOV:26x26  
3.0thk/1.0sp  
20/03:16

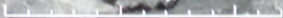

Supplement: MOESM2 [file 9443716]
